# Supplementary material for: Revealing the catalytic oxidation mechanism of CO on α-Fe2O3 surfaces: an ab initio thermodynamic study
Source: Royal Society of Chemistry journal article supplement (doi:10.1039/d4cp04247f), 2024-12-23
Supplement: d4cp04247f1.pdf [file d4cp04247f1.pdf]

# Electronic Supplementary Information – Revealing catalytic oxidation mechanism of CO on $\alpha$ -Fe<sub>2</sub>O<sub>3</sub> surface: An *ab initio* thermodynamic study

Yun-Hyok Song<sup>a</sup>, Yun-Hyok Kye<sup>a,b\*</sup>, Myong-Il Pang<sup>b</sup>, Yong-Min Ho<sup>b</sup>,  
Hyon-Chol Choe<sup>a</sup>, Chol-Jun Yu<sup>a\*</sup>, Chol-Yong Ri<sup>b</sup>

<sup>a</sup>Computational Materials Design (CMD), Faculty of Materials Science, Kim Il Sung University,  
Pyongyang, PO Box 76, Democratic People's Republic of Korea

<sup>b</sup>Institute of Nanomaterials, Faculty of Materials Science, Kim Il Sung University,  
Pyongyang, PO Box 76, Democratic People's Republic of Korea

## Correction method for charged defect

Correction energy  $E_{\text{corr}}$  mainly accounts for the electrostatic interactions between periodically charged supercells with neutralizing background for a computational convergence. As implemented in the Quantum ESPRESSO code [2], the Makov-Payne correction method was used without considering quadrupole moment [3] as follows,

$$E_{\text{corr}}^{\text{MP}} = \alpha q^2 / \epsilon L, \quad (1)$$

where  $\alpha$ ,  $\epsilon$  and  $L$  are the Madelung constant, static dielectric constant and supercell lattice constant respectively. The correction energy  $E_{\text{corr}}$  also should include the band-dispersion correction for shallow defects according to the following equation [1],

$$E_{\text{corr}}^{\text{band}} = \begin{cases} -\sum_k w_k f_k [\epsilon_{\text{CB}}(k) - \epsilon_{\text{CBM}}] & ; \text{shallow donor} \\ \sum_k w_k (1 - f_k) [\epsilon_{\text{VB}}(k) - \epsilon_{\text{VBM}}] & ; \text{shallow acceptor} \end{cases} \quad (2)$$

Defect band occupations  $f_k$  were taken from the output file of projected density of states (PDOS) calculation and multiplied by their weights  $w_k$ .  $\epsilon_{\text{VB}}(k)$  ( $\epsilon_{\text{CB}}(k)$ ) is the eigen energy of each  $k$  state on fully occupied upper valence band (unoccupied lower conduction band).  $E_{\text{F}}$  is the Fermi energy, meaning the chemical potential of electron-reservoir with which the defects exchange electrons to be charged differently. The value of  $E_{\text{F}}$  varies between the valence band maximum (VBM) and the conduction band minimum (CBM) of the perfect bulk material. When a defect is created,  $E_{\text{F}}$  should represent the potential shift of the reservoir. The potential alignment term  $\Delta V$  was estimated by comparing deep-lying 3d state of Fe atom in the middle fixed layer of the surface slab with the one in bulk material.

---

\*Corresponding author: Yun-Hyok Kye, yh.kye0117@ryongnamsan.edu.kp; Chol-Jun Yu, cj.yu@ryongnamsan.edu.kp

Table S1. Löwdin charge of surface atoms relevant to CO adsorption.

|                     | Fe-O <sub>3</sub> -Fe- |         |            | O <sub>d</sub> -Fe-O <sub>3</sub> |         |            | O <sub>2m</sub> -Fe-O <sub>3</sub> - |         |            | O <sub>t</sub> -Fe-O <sub>3</sub> - |         |            |
|---------------------|------------------------|---------|------------|-----------------------------------|---------|------------|--------------------------------------|---------|------------|-------------------------------------|---------|------------|
|                     | before                 | after   | $\Delta e$ | before                            | after   | $\Delta e$ | before                               | after   | $\Delta e$ | before                              | after   | $\Delta e$ |
| Fe                  | 0.7961                 | 0.5831  | -0.2130    | 0.8118                            | 0.6428  | -0.1690    | 0.7332                               | 0.7354  | 0.0022     | 0.6175                              | 0.6470  | 0.0295     |
| O <sub>3</sub>      | -0.4598                | -0.4558 | 0.0040     | -0.1824                           | -0.1898 | -0.0074    | -0.4768                              | -0.4724 | 0.0044     | -0.3933                             | -0.3731 | 0.0202     |
| O <sub>d,t,2m</sub> | -                      | -       | -          | -0.2808                           | -0.3090 | -0.0282    | 0.1671                               | 0.1684  | 0.0013     | -0.1191                             | -0.1052 | 0.0139     |
| C(CO)               | 0.2547                 | 0.4020  | 0.1473     | 0.2547                            | 0.4028  | 0.1481     | 0.2547                               | 0.2501  | -0.0046    | 0.2547                              | 0.2690  | 0.0143     |
| O(CO)               | -0.0903                | -0.0609 | 0.0297     | -0.0903                           | -0.0545 | 0.0358     | -0.0903                              | -0.0908 | -0.0005    | -0.0903                             | -0.0882 | -0.0021    |

Table S2. Löwdin charge of surface atoms relevant to CO oxidation.

|                       | Fe-O <sub>3</sub> -Fe- |         |         | O <sub>d</sub> -Fe-O <sub>3</sub> |         |         | O <sub>2m</sub> -Fe-O <sub>3</sub> - |         |         | O <sub>t</sub> -Fe-O <sub>3</sub> - |         |         |
|-----------------------|------------------------|---------|---------|-----------------------------------|---------|---------|--------------------------------------|---------|---------|-------------------------------------|---------|---------|
|                       | IS                     | TS      | FS      | IS                                | TS      | FS      | IS                                   | TS      | FS      | IS                                  | TS      | FS      |
| Fe                    | 0.5831                 | 0.6226  | 0.5879  | 0.6428                            | 0.6543  | 0.7806  | 0.7354                               | 0.7704  | 0.6530  | 0.6470                              | 0.7484  | 0.7397  |
| O <sub>3,d,t,2m</sub> | -0.4558                | -0.4491 | -0.1996 | -0.3090                           | -0.2634 | -0.2297 | 0.1684                               | 0.0650  | -0.2527 | -0.1052                             | -0.3260 | -0.2369 |
| C(CO)                 | 0.4020                 | 0.3865  | 0.7808  | 0.4028                            | 0.4426  | 0.7425  | 0.2501                               | 0.4018  | 0.7723  | 0.2690                              | 0.4073  | 0.7952  |
| O(CO)                 | -0.0609                | -0.0814 | -0.2388 | -0.0545                           | -0.0329 | -0.2596 | -0.0908                              | -0.1387 | -0.2712 | -0.0882                             | -0.1044 | -0.2163 |

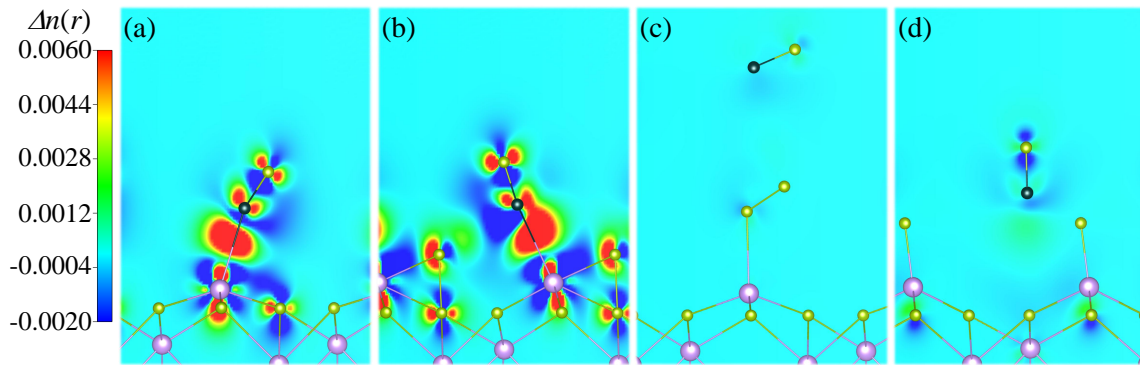

Figure S1. CO adsorption-induced electron charge density variation in  $\text{Fe}_2\text{O}_3$  (0001) surface with (a)  $\text{Fe-O}_3\text{-Fe-}$ , (b)  $\text{O}_d\text{-Fe-O}_3\text{-}$ , (c)  $\text{O}_{2m}\text{-Fe-O}_3\text{-}$  and (d)  $\text{O}_t\text{-Fe-O}_3\text{-}$  terminations. Positive (negative) value indicates electronic charge accumulation (depletion).

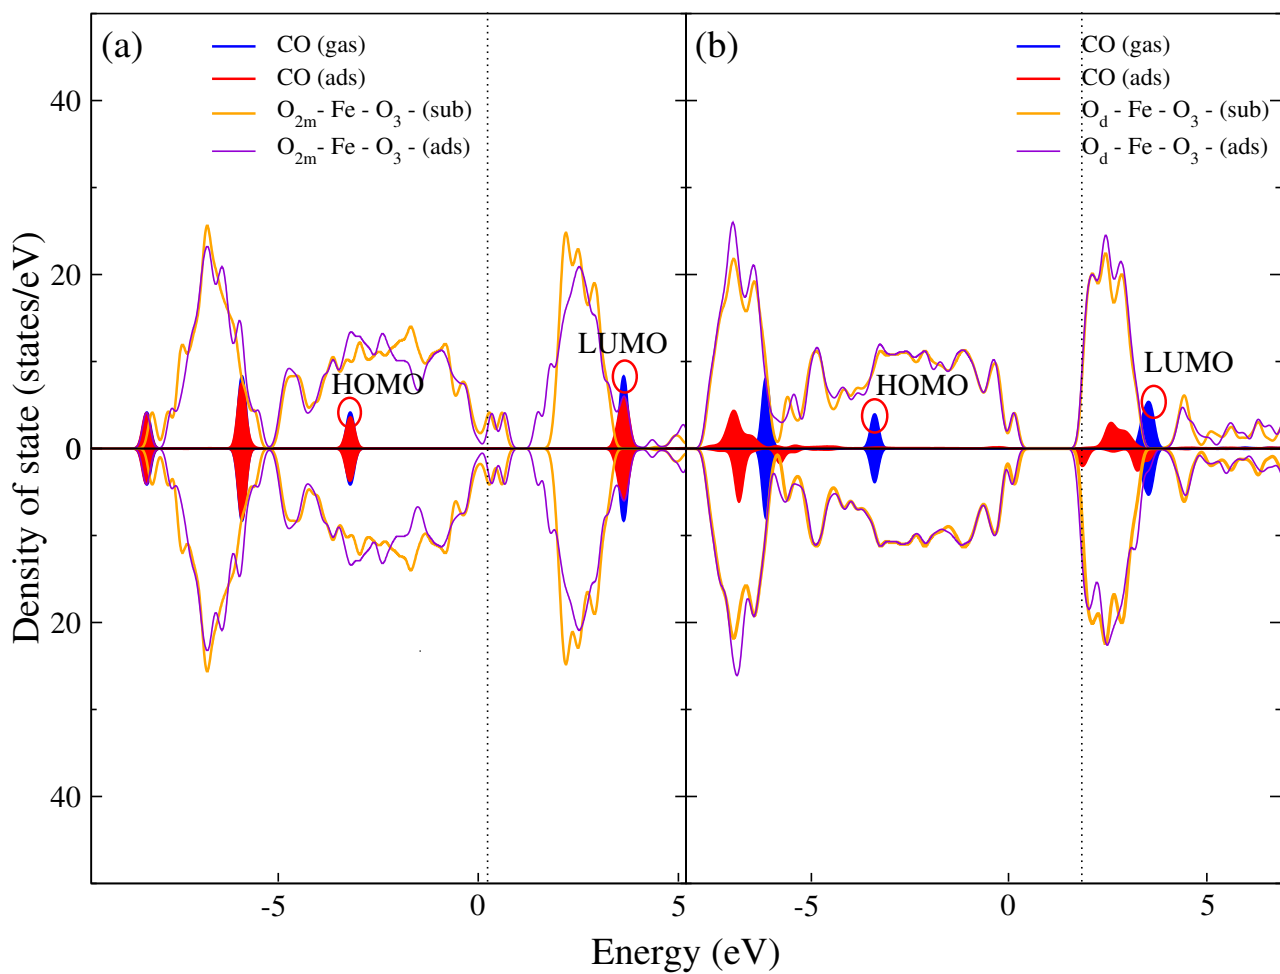

Figure S2. TDOS for spin-up (top panel) and spin-down (bottom panel) states of isolated CO molecule, adsorbed CO molecule, pristine substrates and CO-adsorbed surfaces with (a)  $\text{O}_{2m}\text{-Fe-O}_3\text{-}$  and (b)  $\text{O}_d\text{-Fe-O}_3\text{-}$  terminations. The VBM of the bulk phase of  $\alpha\text{-Fe}_2\text{O}_3$  is set to be zero and the Fermi levels ( $E_F$ ) of pristine substrates are indicated by vertical dotted lines.

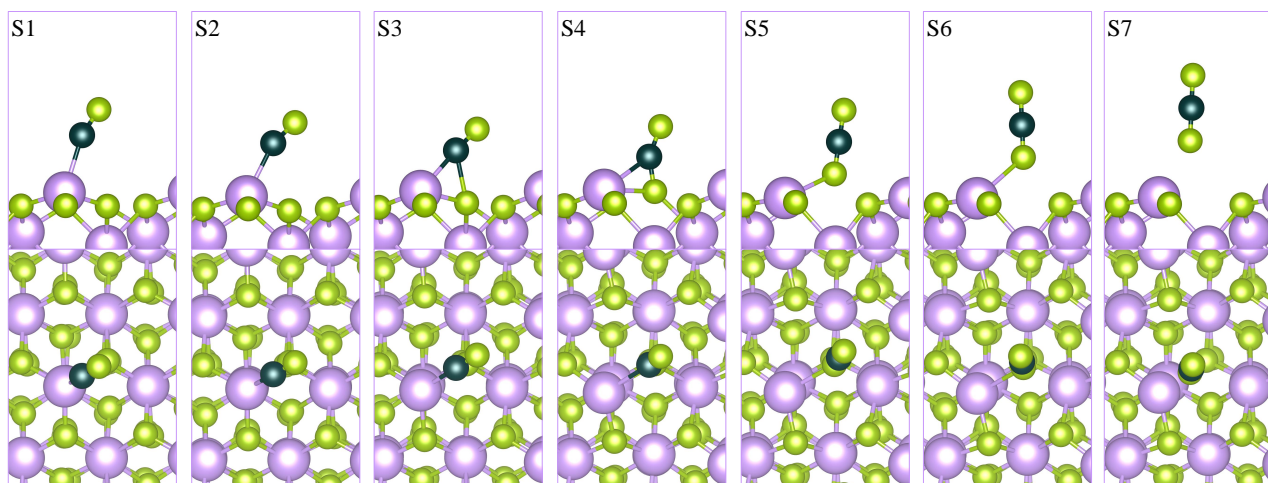

Figure S3. Ball-and-stick view of initial (S1), intermediate (S2-S6) and final (S7) state during CO oxidation to  $\text{CO}_2$  on  $\text{Fe}_2\text{O}_3$  (0001) surface with stoichiometric  $\text{Fe-O}_3\text{-Fe-}$  termination, identified by NEB simulation.

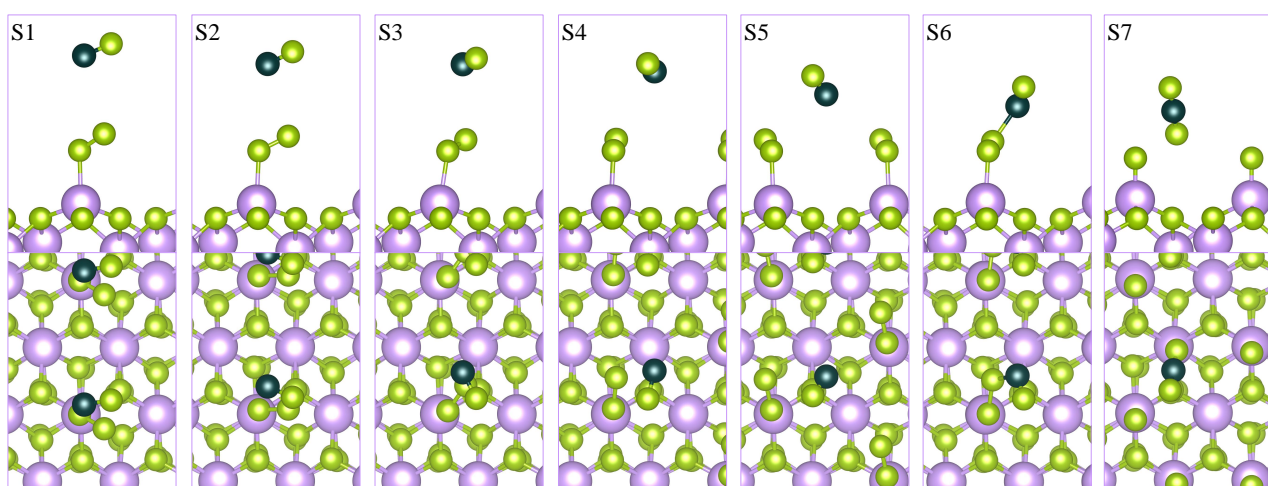

Figure S4. Ball-and-stick view of initial (S1), intermediate (S2-S6) and final (S7) state during CO oxidation to  $\text{CO}_2$  on  $\text{Fe}_2\text{O}_3$  (0001) surface with  $\text{O}_{2\text{m}}\text{-Fe-O}_3$  termination, identified by NEB simulation.

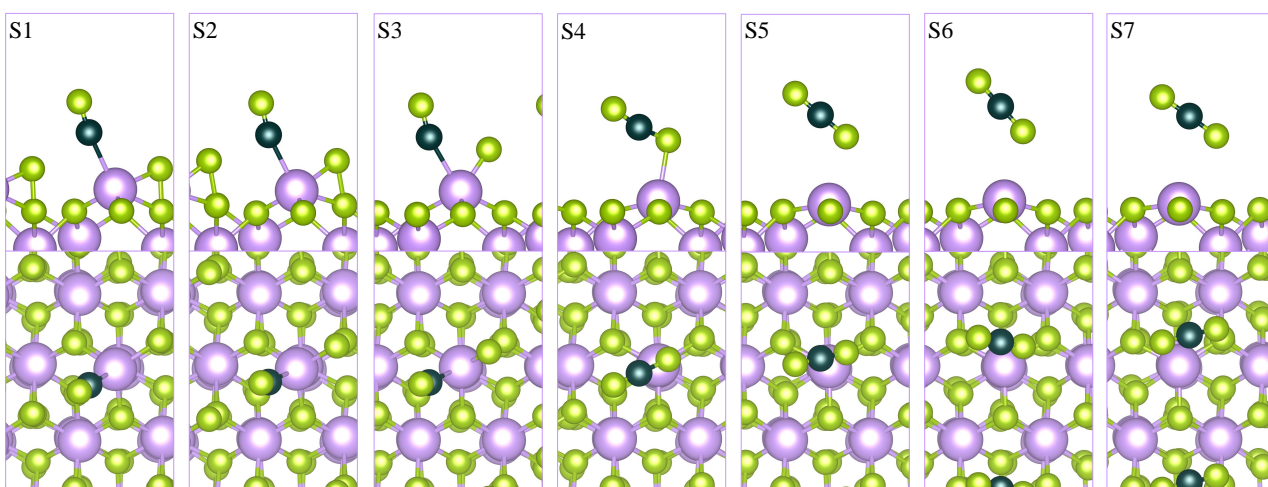

Figure S5. Ball-and-stick view of initial (S1), intermediate (S2-S6) and final (S7) state during CO oxidation to  $\text{CO}_2$  on  $\text{Fe}_2\text{O}_3$  (0001) surface with  $\text{O}_4\text{-Fe-O}_3$  termination, identified by NEB simulation.

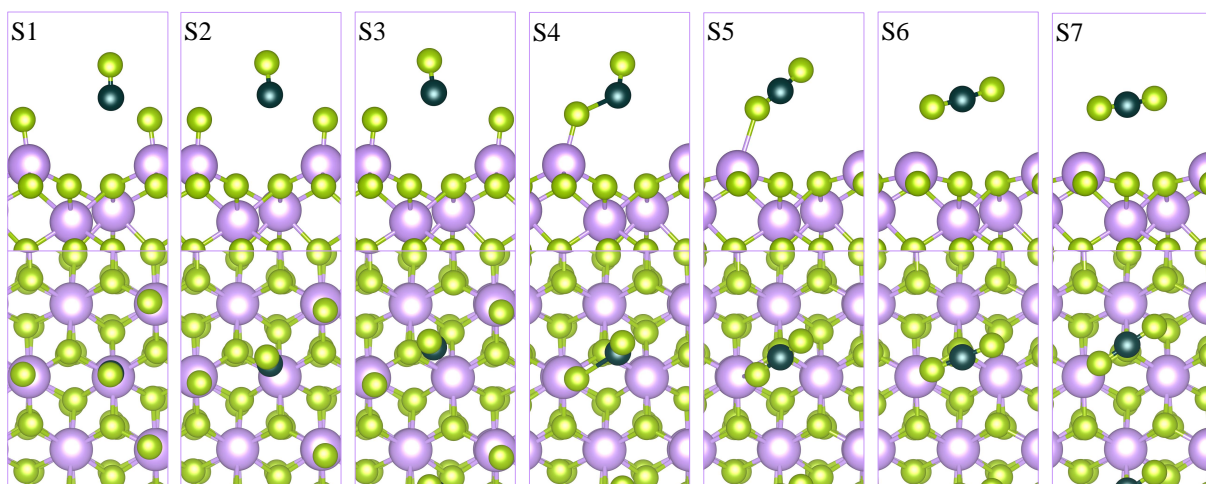

Figure S6. Ball-and-stick view of initial (S1), intermediate (S2-S6) and final (S7) state during CO oxidation to  $\text{CO}_2$  on  $\text{Fe}_2\text{O}_3$  (0001) surface with  $\text{O}_\text{l}$ - $\text{Fe}$ - $\text{O}_3$  termination, identified by NEB simulation.

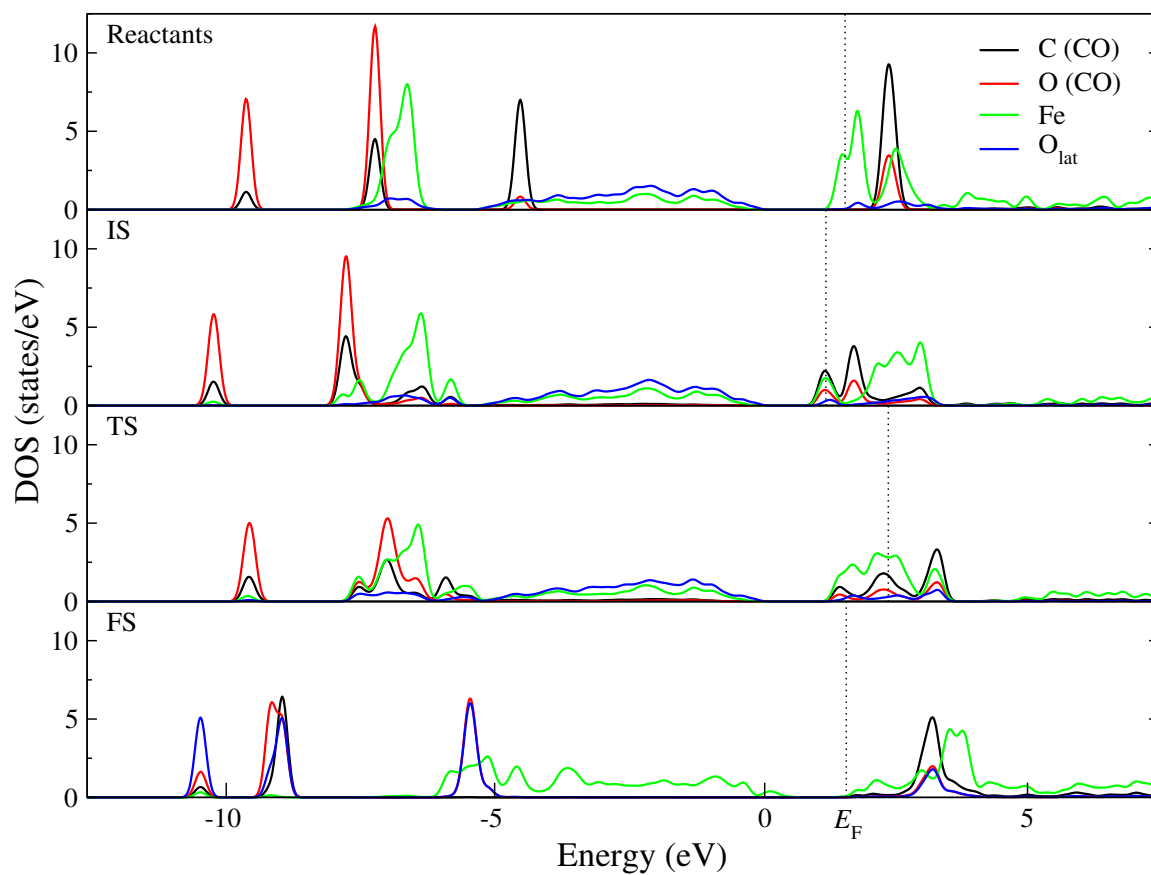

Figure S7. Atom-projected PDOS of stoichiometric  $\text{Fe-O}_3\text{-Fe}$ -terminated surface before CO oxidation and in IS, TS and FS during CO oxidation.

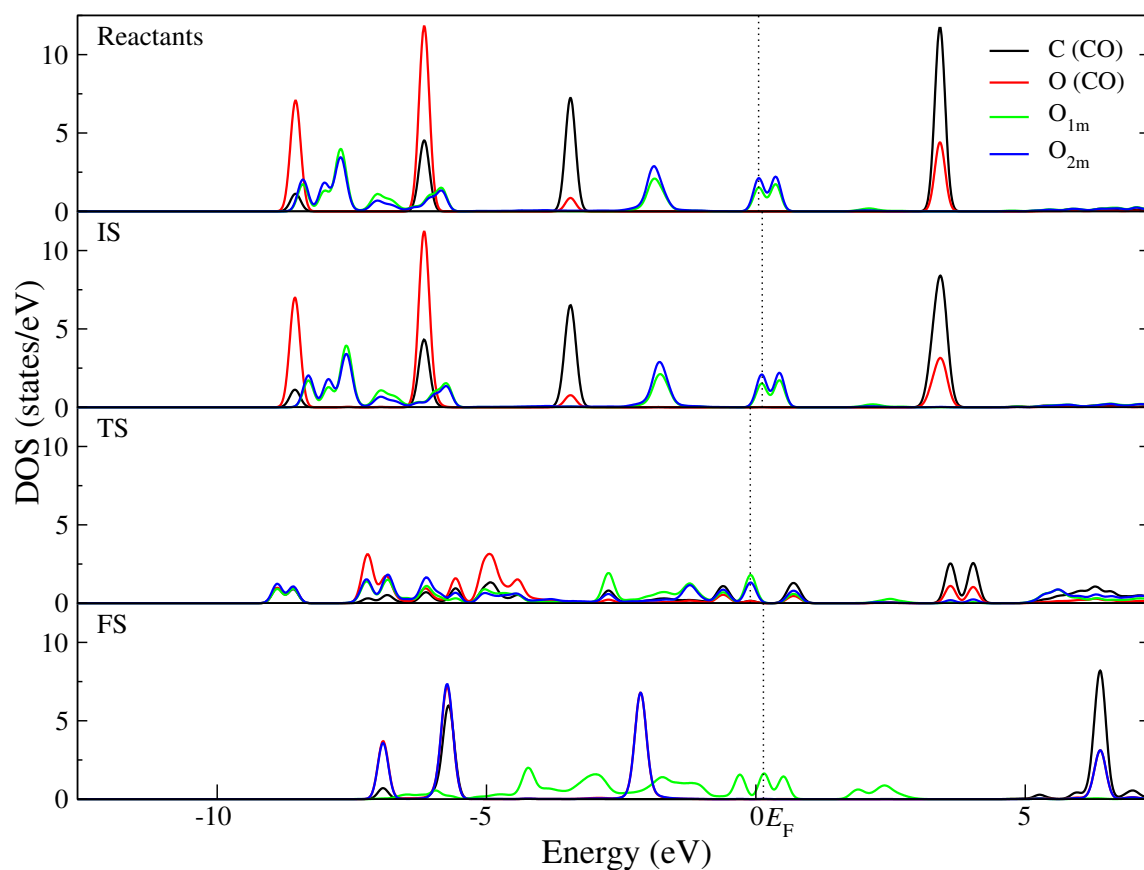

Figure S8. Atom-projected PDOS of  $\text{O}_{2\text{m}}\text{-Fe-O}_3\text{-}$  terminated surface before CO oxidation and in IS, TS and FS during CO oxidation.

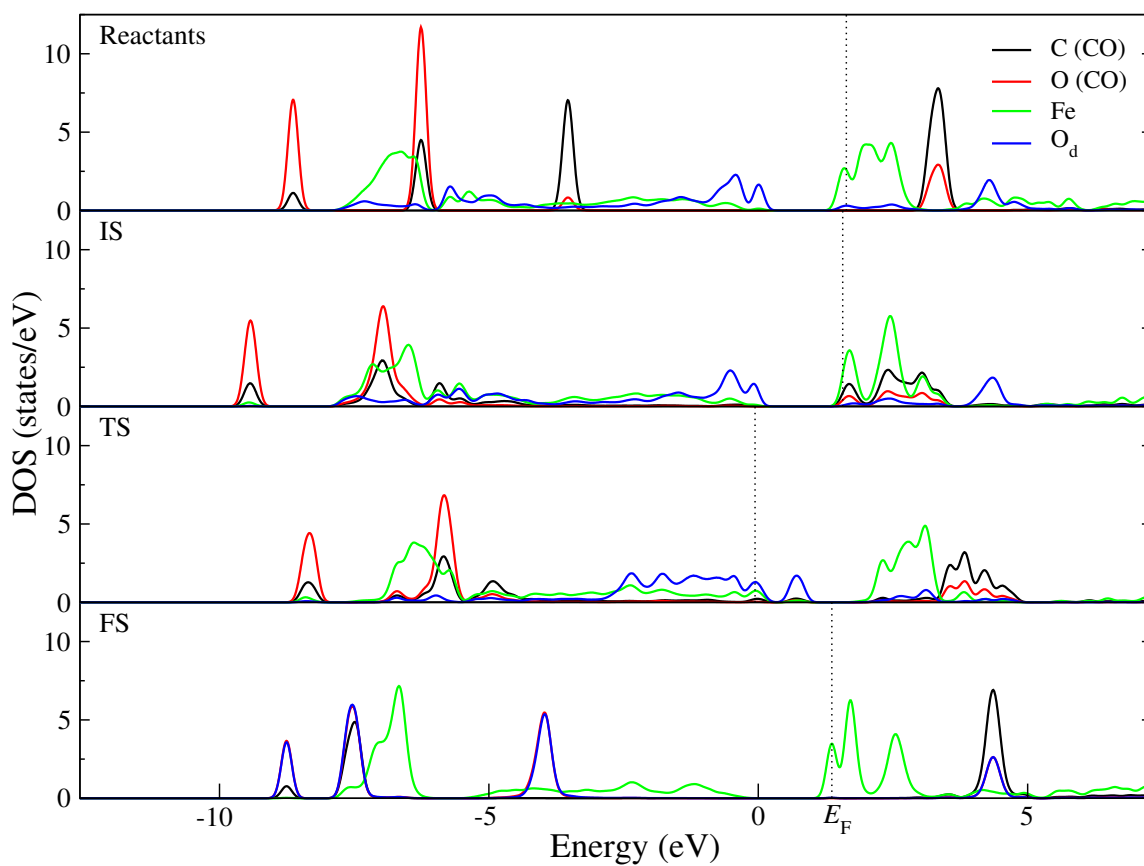

Figure S9. Atom-projected PDOS of  $\text{O}_\text{d}\text{-Fe-O}_3\text{-}$  terminated surface before CO oxidation and in IS, TS and FS during CO oxidation.

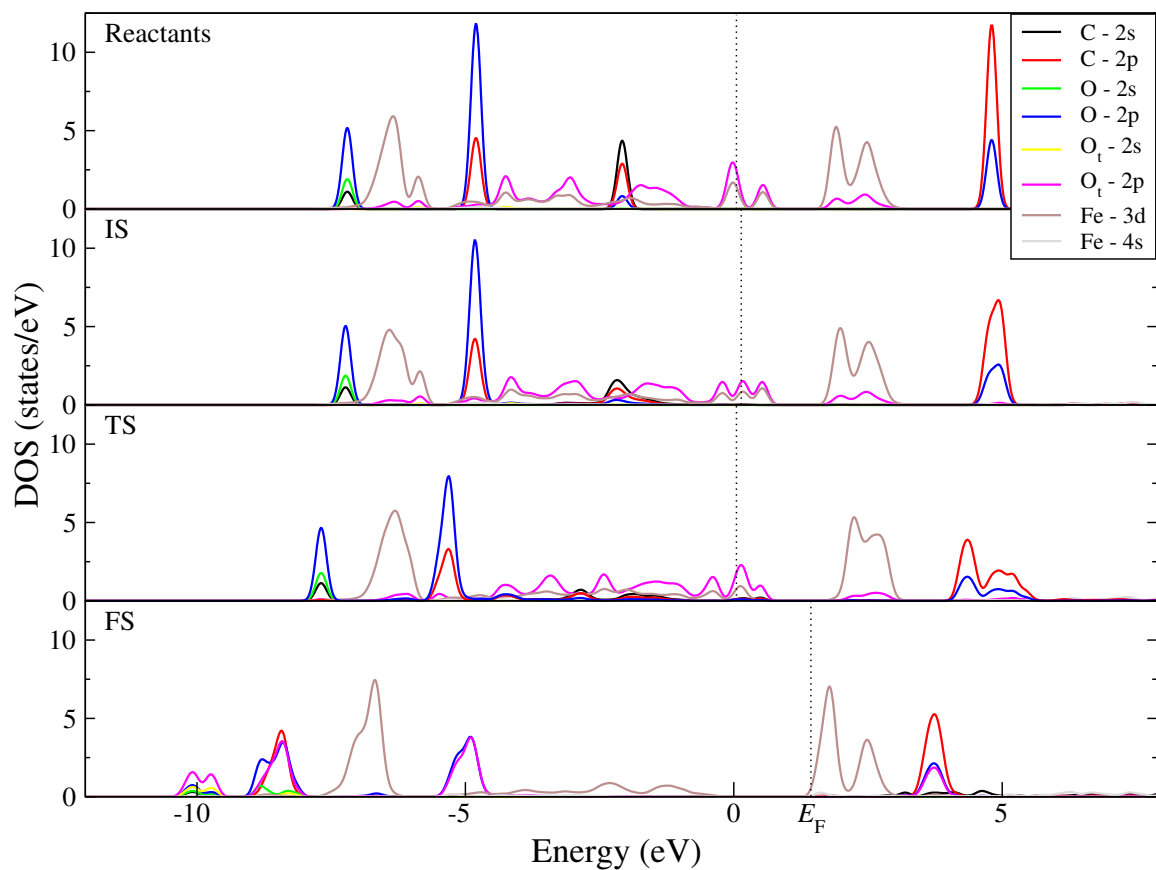

Figure S10. Atomic orbital-projected PDOS of  $O_t$ -Fe- $O_3$ - terminated surface before CO oxidation and in IS, TS and FS during CO oxidation.

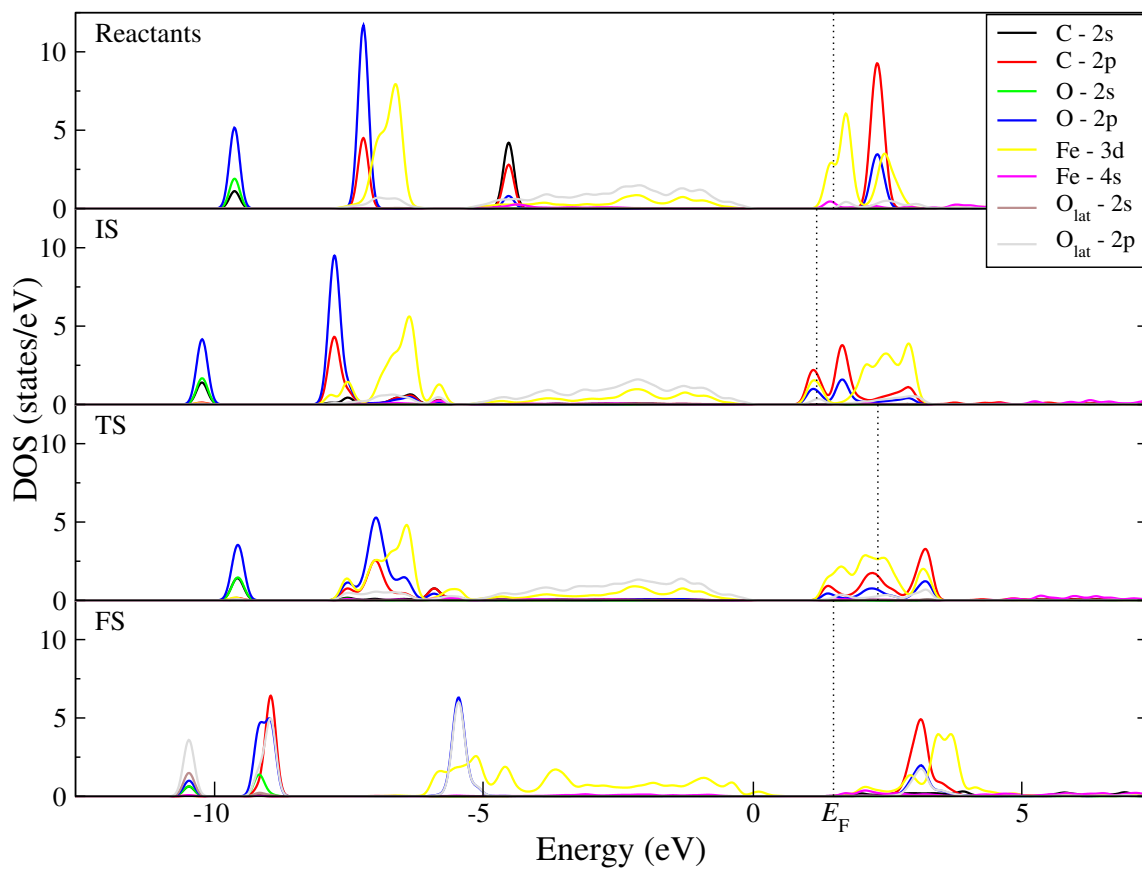

Figure S11. Atomic orbital-projected PDOS of Fe- $O_3$ -Fe- terminated surface before CO oxidation and in IS, TS and FS during CO oxidation.

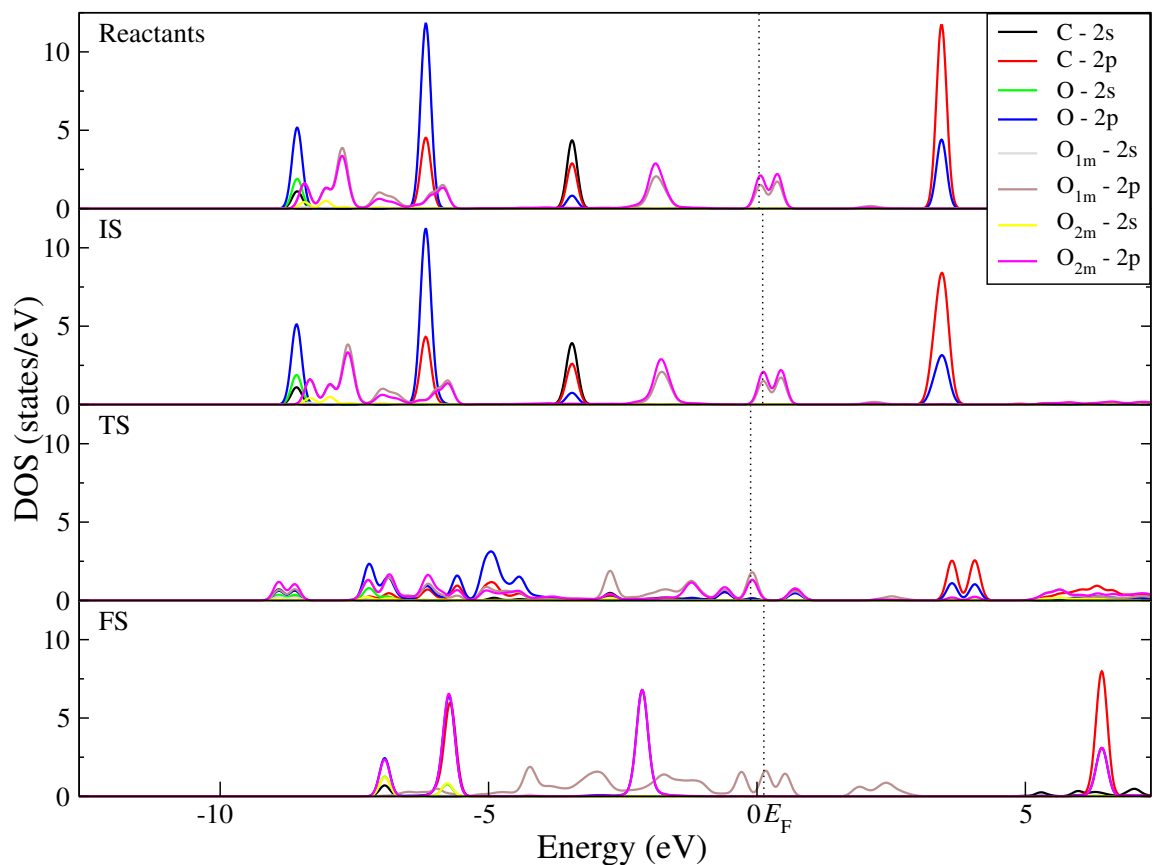

Figure S12. Atomic orbital-projected PDOS of  $O_{2m}-O_3$ -Fe- terminated surface before CO oxidation and in IS, TS and FS during CO oxidation.

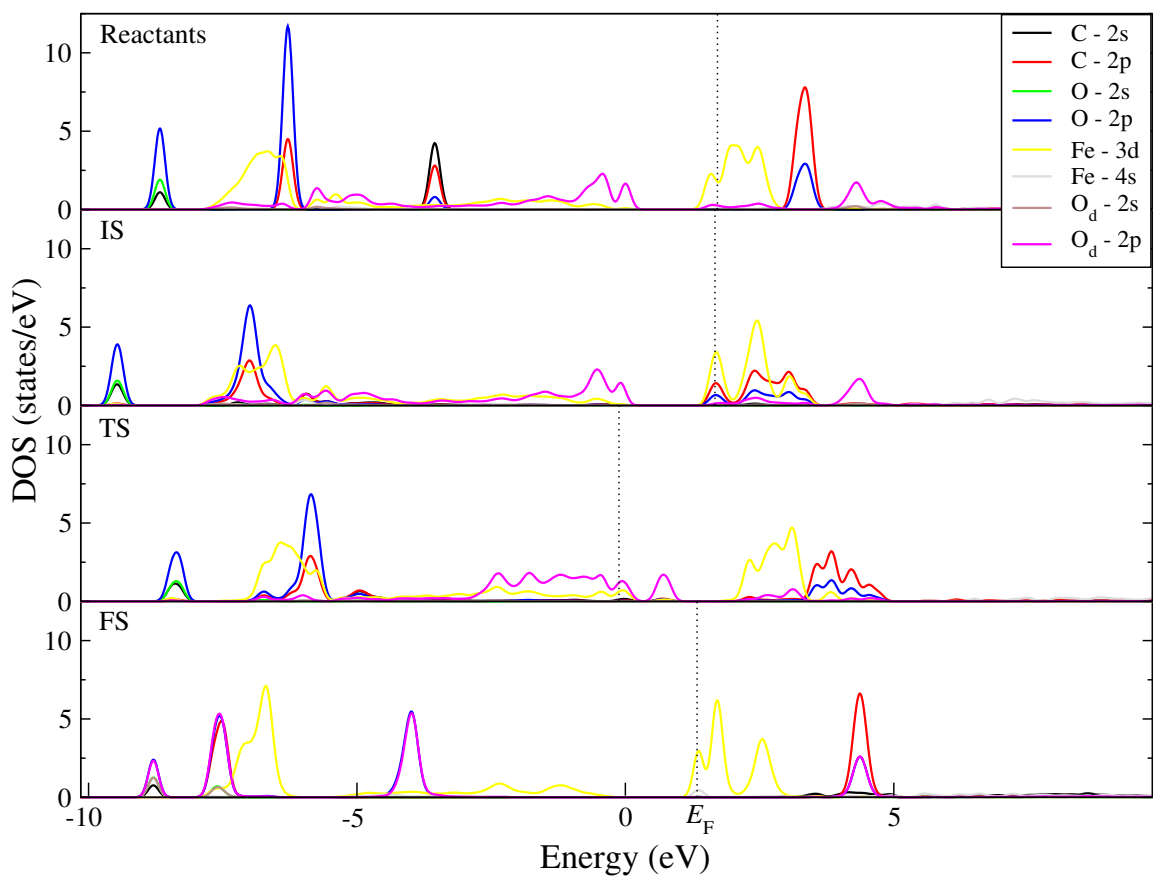

Figure S13. Atomic orbital-projected PDOS of  $O_4-O_3$ -Fe- terminated surface before CO oxidation and in IS, TS and FS during CO oxidation.

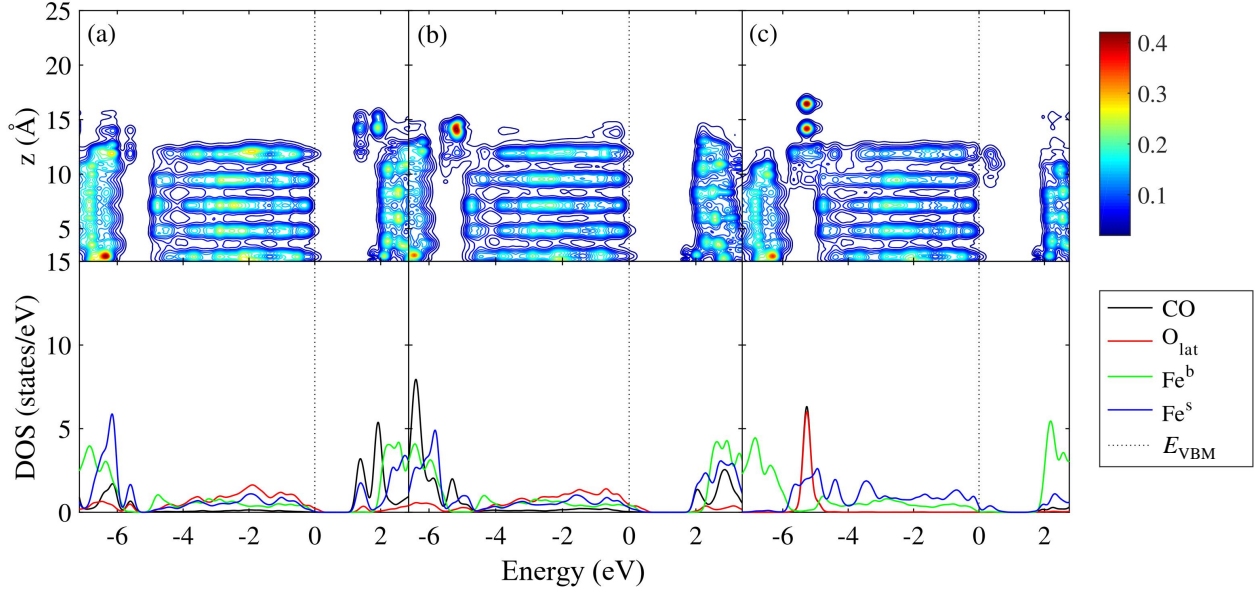

Figure S14.  $z$  axis-resolved LDOS (top panel) and atom-projected PDOS of  $\alpha$ -Fe<sub>2</sub>O<sub>3</sub> (0001) surface with stoichiometric Fe-O<sub>3</sub>-Fe- termination in CO oxidation. The VBM of the bulk phase is set to be zero as indicated by vertical dotted lines.

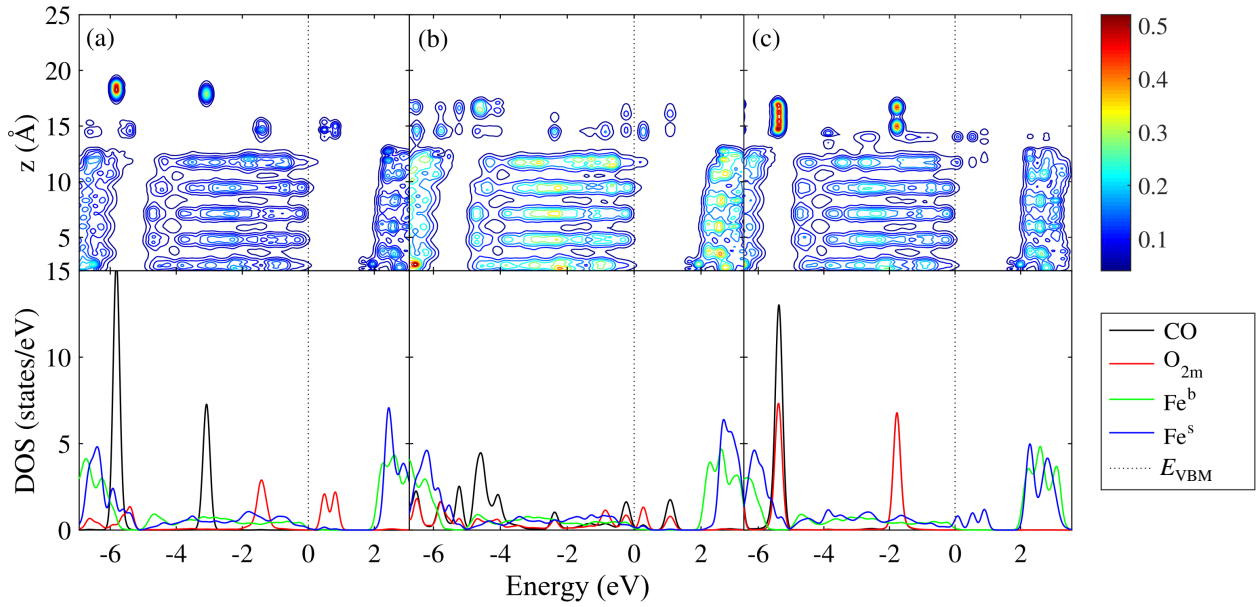

Figure S15.  $z$  axis-resolved LDOS (top panel) and atom-projected PDOS of  $\alpha$ -Fe<sub>2</sub>O<sub>3</sub> (0001) surface with O<sub>2m</sub>-Fe-O<sub>3</sub>- termination in CO oxidation. The VBM of the bulk phase is set to be zero as indicated by vertical dotted lines.

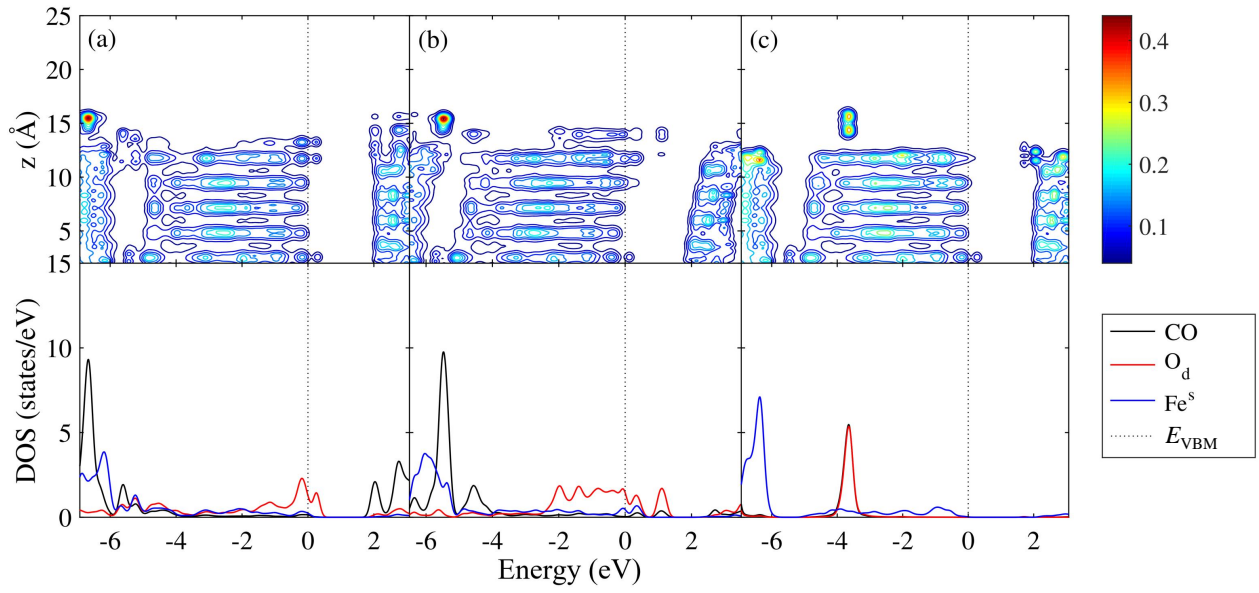

Figure S16.  $z$  axis-resolved LDOS (top panel) and atom-projected PDOS of  $\alpha$ -Fe<sub>2</sub>O<sub>3</sub> (0001) surface with O<sub>d</sub>-Fe-O<sub>3</sub>- termination in CO oxidation. The VBM of the bulk phase is set to be zero as indicated by vertical dotted lines.

## References

- [1] C. Freysoldt, B. Grabowski, T. Hickel, J. Neugebauer, G. Kresse, A. Janotti, and C. G. van de Walle. First-principles calculations for point defects in solids. *Rev. Mod. Phys.*, 86:253–305, 2014.
- [2] P. Giannozzi, S. Baroni, N. Bonini, M. Calandra, R. Car, C. Cavazzoni, D. Ceresoli, G. L. Chiarotti, M. Cococcioni, I. Dabo, and *et al.* Quantum espresso: A modular and open-source software project for quantum simulations of materials. *J. Phys.: Condens. Matter*, 21:395502, 2009.
- [3] G. Makov and M. C. Payne. Periodic boundary conditions in ab initio calculations. *Phys. Rev. B*, 51:4014, 1995.
